# Supplementary material for: Preparation of well-defined titania–silica spherical particles
Source: Royal Society of Chemistry journal article supplement (doi:10.1039/c2jm30502j), 2012-01-01
Supplement: c2jm30502j.pdf [file c2jm30502j.pdf]

## Preparation of well-defined titania-silica spherical particles

Kota Shiba,<sup>a</sup> Soh Satoh<sup>a</sup> and Makoto Ogawa<sup>\*a,b</sup>

<sup>a</sup> Graduate School of Creative Science and Engineering, Waseda University, 1-6-1 Nishiwaseda, Shinjuku-ku, Tokyo 169-8050, Japan.

<sup>b</sup> Department of Earth Sciences, Waseda University, 1-6-1 Nishiwaseda, Shinjuku-ku, Tokyo 169-8050, Japan.

Fax: +81-3-3207-4950; Tel: +81-3-5286-1511; E-mail: makoto@waseda.jp

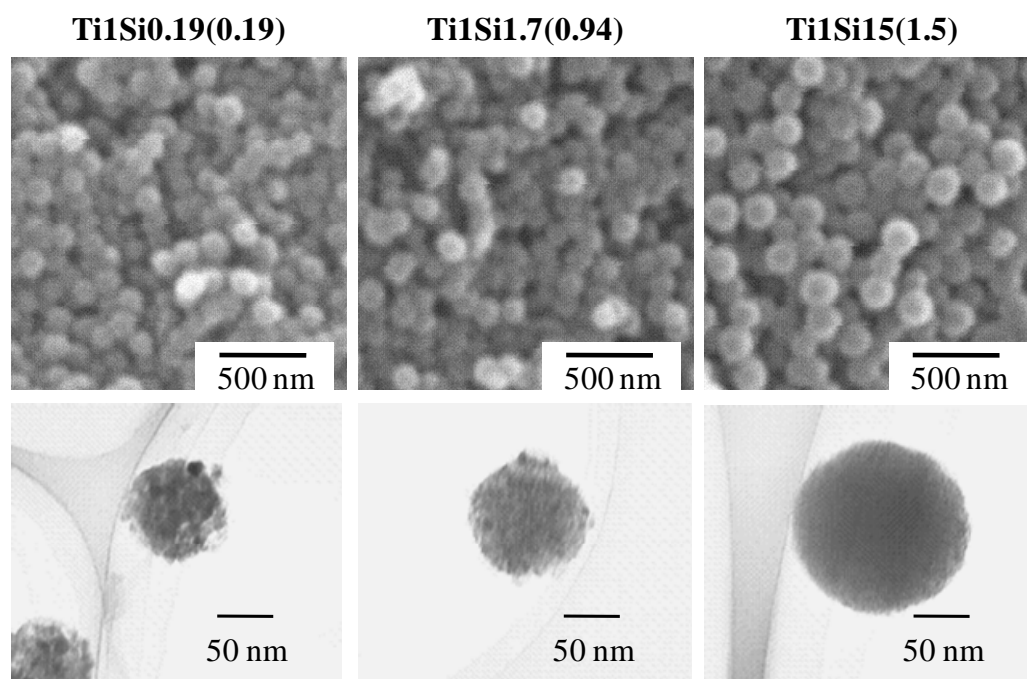

Fig. S1 SEM and TEM images of the titania-silica hybrid particles at different Si/Ti atomic ratio after the extraction of ODA and the calcination at 800 °C for 24 h.

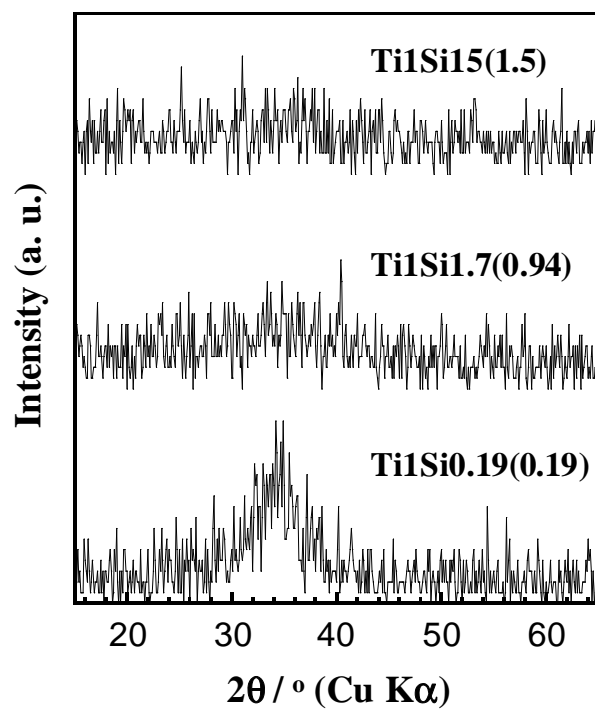

Fig. S2 XRD patterns of the titania-silica hybrid particles with different Si/Ti atomic ratio after the extraction of ODA and the calcination in air at 800 °C for 24 h.

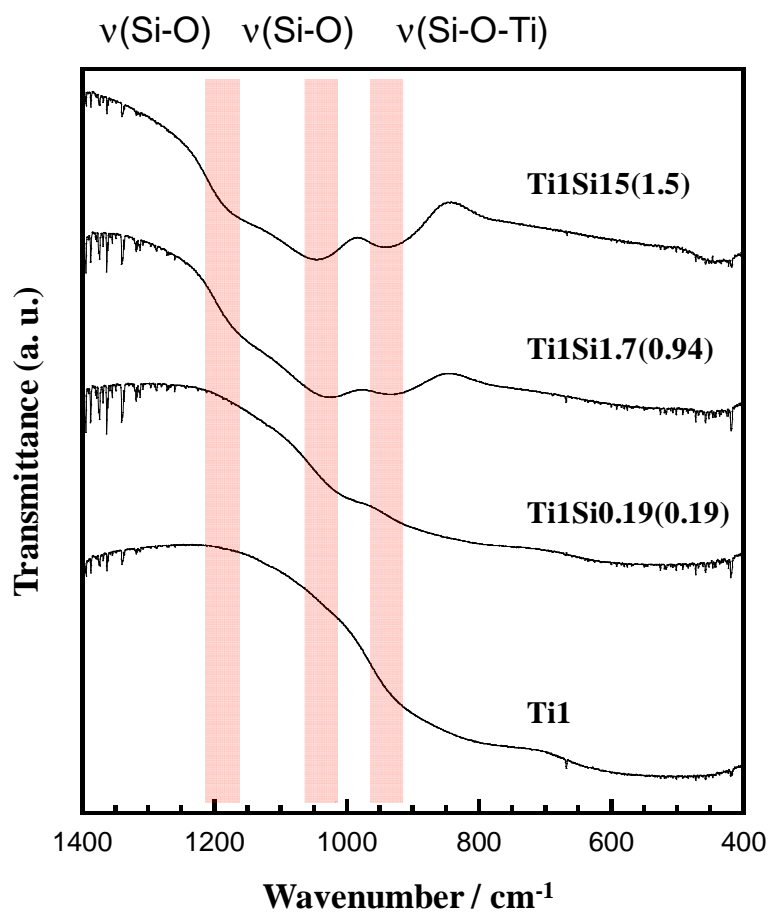

Fig. S3 FT-IR spectra of the titania-silica hybrid particles at different Si/Ti atomic ratio after the extraction of ODA.
